# Supplementary material for: Fluorescent Dynamic Covalent Polymers for DNA Complexation and Templated Assembly
Source: MDPI journal article supplement (doi:10.3390/molecules27196648), 2022-10-06
Supplement: s1 [file s1]

# Fluorescent Dynamic Covalent Polymers for DNA Complexation and Templated Assembly

Clément Kotras,<sup>1,2,⊥</sup> Maxime Leclercq,<sup>1</sup> Maxime Roger,<sup>2</sup> Camille Bouillon,<sup>3</sup> Antonio Recupido,<sup>3</sup> Aurélien Lebrun,<sup>4</sup> Yannick Bessin,<sup>3</sup> Philippe Gerbier,<sup>2</sup> Sébastien Richeter,<sup>2</sup> Sébastien Ulrich,<sup>3\*</sup> Sébastien Clément<sup>2\*</sup>, and Mathieu Surin<sup>1\*</sup>

<sup>1</sup> Laboratory for Chemistry of Novel Materials, Center of Innovation and Research in Materials and Polymers (CIRMAP), University of Mons-UMONS, 7000 Mons, Belgium

<sup>2</sup> ICGM Institut Charles Gerhardt Montpellier, UMR 5253, CNRS, Université de Montpellier, ENSCM, 34095 Montpellier, France

<sup>3</sup> IBMM, Université de Montpellier, CNRS, ENSCM, Montpellier, France

<sup>4</sup> Laboratoire de Mesures Physiques, Montpellier, France

⊥ Present address: IES Institut d'Electronique et des Systèmes, UMR 5214, Université de Montpellier 34095 Montpellier, France

## Table of contents

|                                                                                                                                                                                                                       |    |
|-----------------------------------------------------------------------------------------------------------------------------------------------------------------------------------------------------------------------|----|
| Figure S1: FTIR-ATR spectrum of <b>FT</b> .                                                                                                                                                                           | S3 |
| Figure S2: <sup>1</sup> H NMR spectrum (500 MHz) of <b>FT</b> in CDCl <sub>3</sub> at 298K.                                                                                                                           | S3 |
| Figure S3: <sup>13</sup> C{ <sup>1</sup> H} NMR spectrum (126 MHz) of <b>FT</b> in CDCl <sub>3</sub> at 298K.                                                                                                         | S4 |
| Figure S4: High resolution MALDI-TOF mass spectrum of <b>FT</b> in the positive mode                                                                                                                                  | S4 |
| Figure S5: FTIR-ATR spectrum of <b>FT<sup>c</sup></b>                                                                                                                                                                 | S5 |
| Figure S6: <sup>1</sup> H NMR spectrum (500 MHz) of <b>FT<sup>c</sup></b> in DMSO- <i>d</i> <sub>6</sub> at 298K.                                                                                                     | S5 |
| Figure S7: <sup>13</sup> C{ <sup>1</sup> H} NMR spectrum (126 MHz) of <b>FT<sup>c</sup></b> in DMSO- <i>d</i> <sub>6</sub> at 298K                                                                                    | S6 |
| Figure S8: High resolution MALDI-TOF mass spectrum of <b>FT<sup>c</sup></b> in the positive mode                                                                                                                      | S6 |
| Figure S9: FTIR-ATR spectrum of <b>FT<sup>n</sup></b>                                                                                                                                                                 | S7 |
| Figure S10: <sup>1</sup> H NMR spectrum (500 MHz) of <b>FT<sup>n</sup></b> in CDCl <sub>3</sub> at 298K                                                                                                               | S7 |
| Figure S11: <sup>13</sup> C{ <sup>1</sup> H} NMR spectrum (126 MHz) of <b>FT<sup>n</sup></b> in CDCl <sub>3</sub> at 298K                                                                                             | S8 |
| Figure S12: High resolution ASAP <sup>+</sup> mass spectrum of <b>FT<sup>n</sup></b> in the positive mode                                                                                                             | S8 |
| Figure S13: Superimposition of DOSY-NMR spectra (600 MHz) of <b>AFT<sup>n</sup></b> at 1 mM (green), 10 mM (violet) and 50 mM (pink) compared to <b>AFT<sup>n</sup></b> (blue) in DMSO- <i>d</i> <sub>6</sub> at 298K | S9 |

|                                                                                                                                                                                                                                                           |     |
|-----------------------------------------------------------------------------------------------------------------------------------------------------------------------------------------------------------------------------------------------------------|-----|
| Figure S14: Superimposition of DOSY-NMR spectra (600 MHz) of <b>AFT<sup>c</sup></b> at 10 mM (blue) compared to <b>FT<sup>c</sup></b> (green) in DMSO- <i>d</i> <sub>6</sub> at 298K.                                                                     | S9  |
| Figure S15: MALDI-TOF (HCCA matrix) mass spectrometry analysis of <b>AFT<sup>n</sup></b> , prepared by the self-assembly of <b>FT<sup>n</sup></b> and <b>Ox-Arg-Hyd</b> carried out at 100 mM in DMSO.                                                    | S10 |
| Figure S16: <sup>1</sup> H NMR spectrum (600 MHz) of <b>AFT<sup>n</sup></b> at 100 mM in DMSO- <i>d</i> <sub>6</sub> at 298K.                                                                                                                             | S10 |
| Figure S17: Synthesis of <b>FT<sup>n</sup></b> -based model compounds from <b>L-Arg-Hyd</b> and <b>D-Arg-Hyd</b> .                                                                                                                                        | S11 |
| Figure S18: LCMS chromatogram of <b>L-1</b> .                                                                                                                                                                                                             | S11 |
| Figure S19: A/ UV-Visible absorption, B/ CD and C/ emission spectra ( $\lambda_{\text{exc}} = 385 \text{ nm}$ ) of <b>AFT<sup>c</sup></b> at 10 $\mu\text{M}$ in TE buffer after successive additions of guanidinium chloride.                            | S12 |
| Figure S20: A/ UV-Visible absorption, B/ CD and C/ emission spectra ( $\lambda_{\text{exc}} = 385 \text{ nm}$ ) of <b>AFT<sup>c</sup></b> at 10 $\mu\text{M}$ in TE buffer after successive additions of ammonium sulfate.                                | S13 |
| Figure S21: CD spectra of A/ <b>AFT<sup>c</sup></b> and B/ <b>AFT<sup>n</sup></b> solutions at 10 $\mu\text{M}$ in TE buffer recorded from 20°C to 86°C.                                                                                                  | S14 |
| Table S1: Name, length and sequence of the dsDNAs employed in this study                                                                                                                                                                                  | S14 |
| Figure S22: UV-Vis absorption (A), CD (B) and emission (C) spectra of 10 $\mu\text{M}$ <b>AFT<sup>n</sup></b> solutions in Tris-EDTA buffer (pH 7.4) upon addition of calf thymus DNA.                                                                    | S15 |
| Figure S23: UV-Vis absorption (A), CD (B) and emission (C) spectra of 10 $\mu\text{M}$ <b>AFT<sup>n</sup></b> solutions in Tris-EDTA buffer (pH 7.4) upon addition of dsR(43) (left) and calf thymus DNA (right).                                         | S16 |
| Figure S24: CD spectra of a mixture of <b>FT<sup>n</sup></b> and <b>OxArgHyd</b> in TE buffer at 10 $\mu\text{M}$ associated with calf thymus DNA at N/P = 5 recorded between 0 and 72h A/ in absence and B/ presence of 100 equivalents of methoxyamine. | S17 |
| Scheme S1: Formation of the oxime <b>Ox-FT<sup>n</sup>-Ox</b> .                                                                                                                                                                                           | S17 |

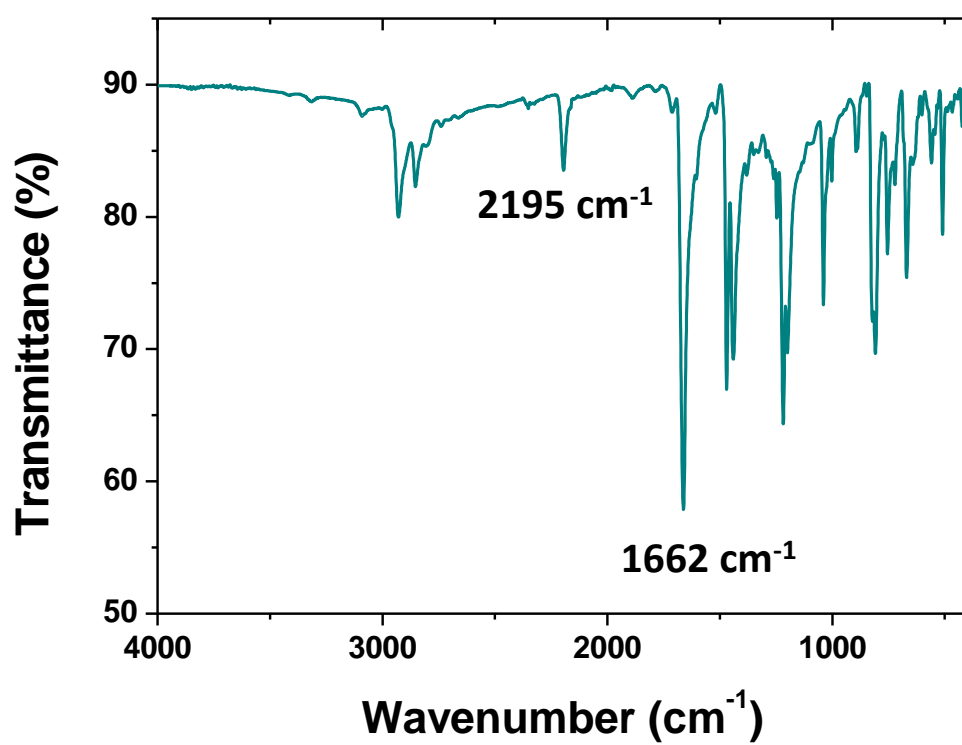

Figure S1: FTIR-ATR spectrum of **FT**.

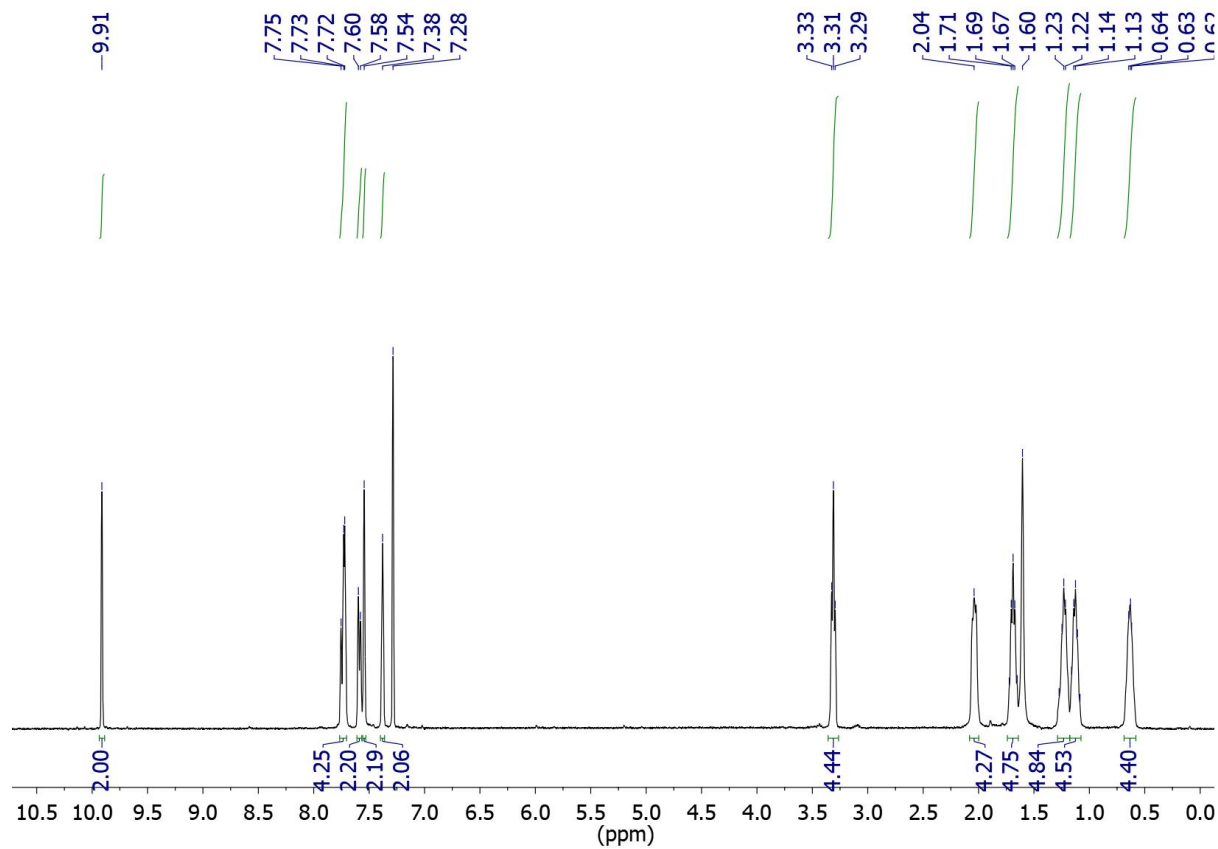

Figure S2: <sup>1</sup>H NMR spectrum (500 MHz) of **FT** in CDCl<sub>3</sub> at 298K.

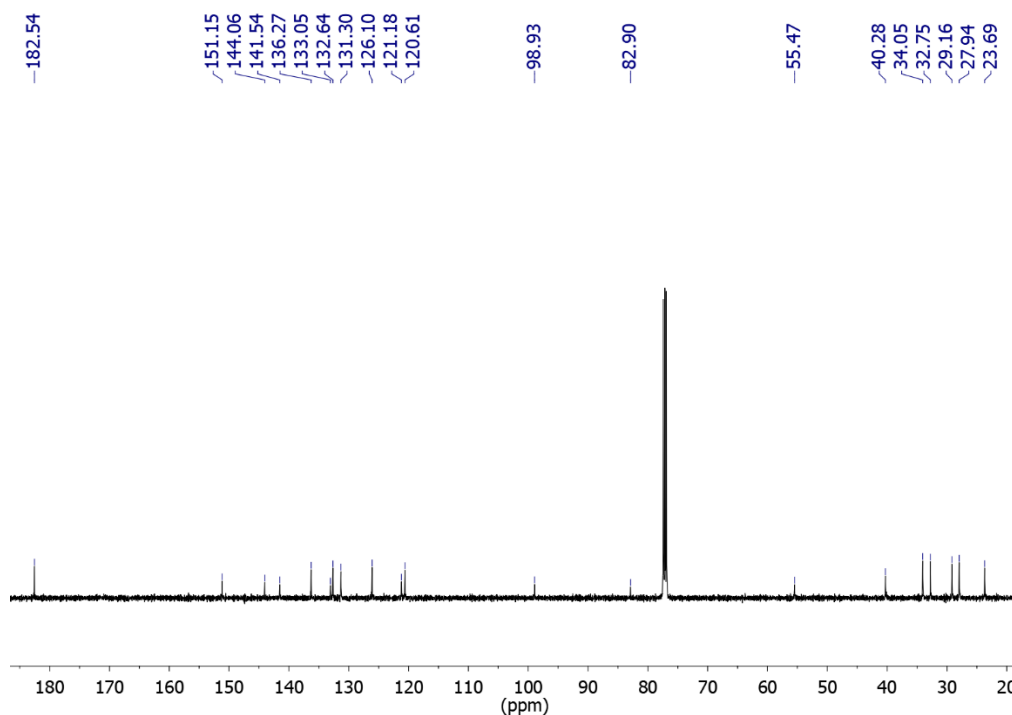

Figure S3:  $^{13}\text{C}\{^1\text{H}\}$  NMR spectrum (126 MHz) of **FT** in  $\text{CDCl}_3$  at 298K.

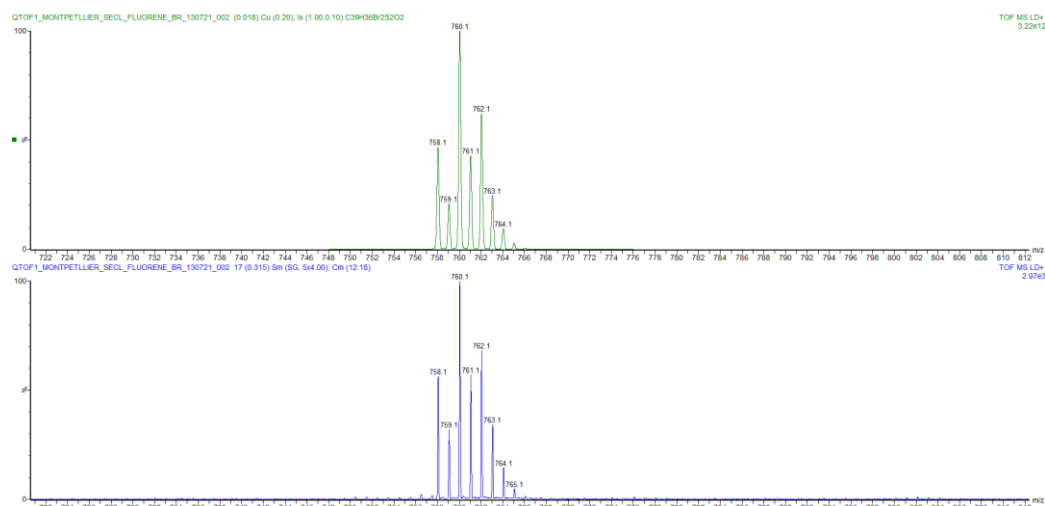

#### Elemental Composition Report

##### Single Mass Analysis

Tolerance = 25.0 PPM / DBE: min = -1.5, max = 150.0

Element prediction: Off

Number of isotope peaks used for i-FIT = 3

##### Monoisotopic Mass, Odd and Even Electron Ions

58 formula(e) evaluated with 4 results within limits (up to 50 closest results for each mass)

Elements Used:

C: 20-50 H: 0-60 O: 0-10 S: 2-2 Br: 2-2

| Minimum: |            |      |      | -1.5 |       |       |         |                    |
|----------|------------|------|------|------|-------|-------|---------|--------------------|
| Maximum: |            |      | 5.0  | 25.0 | 150.0 |       |         |                    |
| Mass     | Calc. Mass | mDa  | PPM  | DBE  | i-FIT | Norm  | Conf(%) | Formula            |
| 758.0525 | 758.0523   | 0.2  | 0.3  | 21.0 | 78.0  | 0.254 | 77.53   | C39 H36 O2 S2 Br2  |
|          | 758.0582   | -5.7 | -7.5 | 12.0 | 79.8  | 1.995 | 13.61   | C32 H40 O7 S2 Br2  |
|          | 758.0430   | 9.5  | 12.5 | 8.0  | 81.3  | 3.500 | 3.02    | C28 H40 O10 S2 Br2 |
|          | 758.0371   | 15.4 | 20.3 | 17.0 | 80.6  | 2.840 | 5.84    | C35 H36 O5 S2 Br2  |

Figure S4: High resolution MALDI-TOF mass spectrum of **FT** in the positive mode.

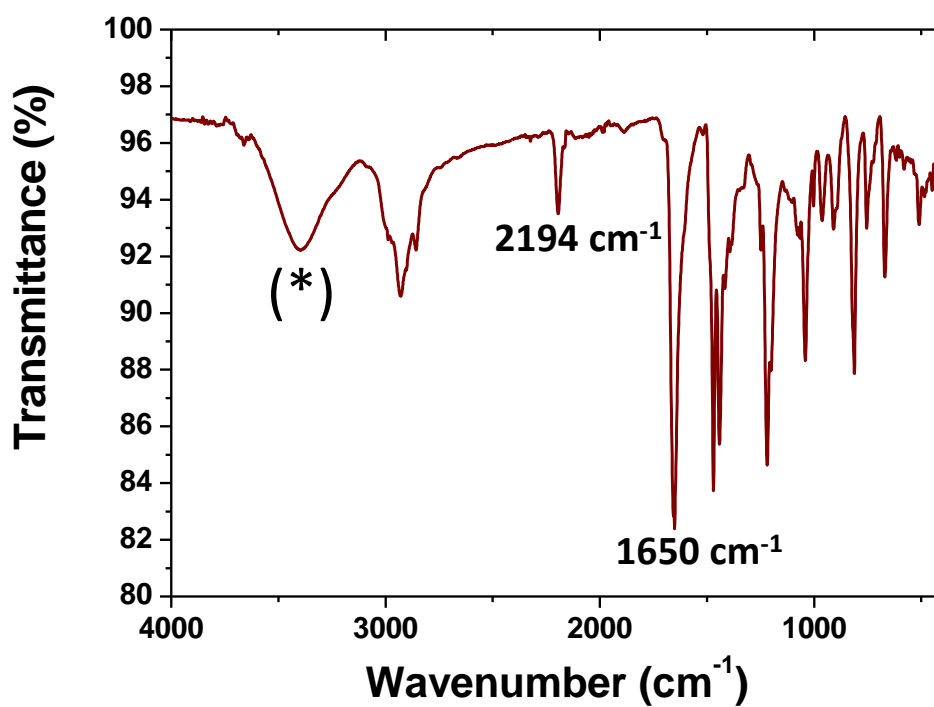

Figure S5: FTIR-ATR spectrum of **FT<sup>c</sup>**. (\*) Traces of water due to the strong hydrophilicity of **FT<sup>c</sup>**.

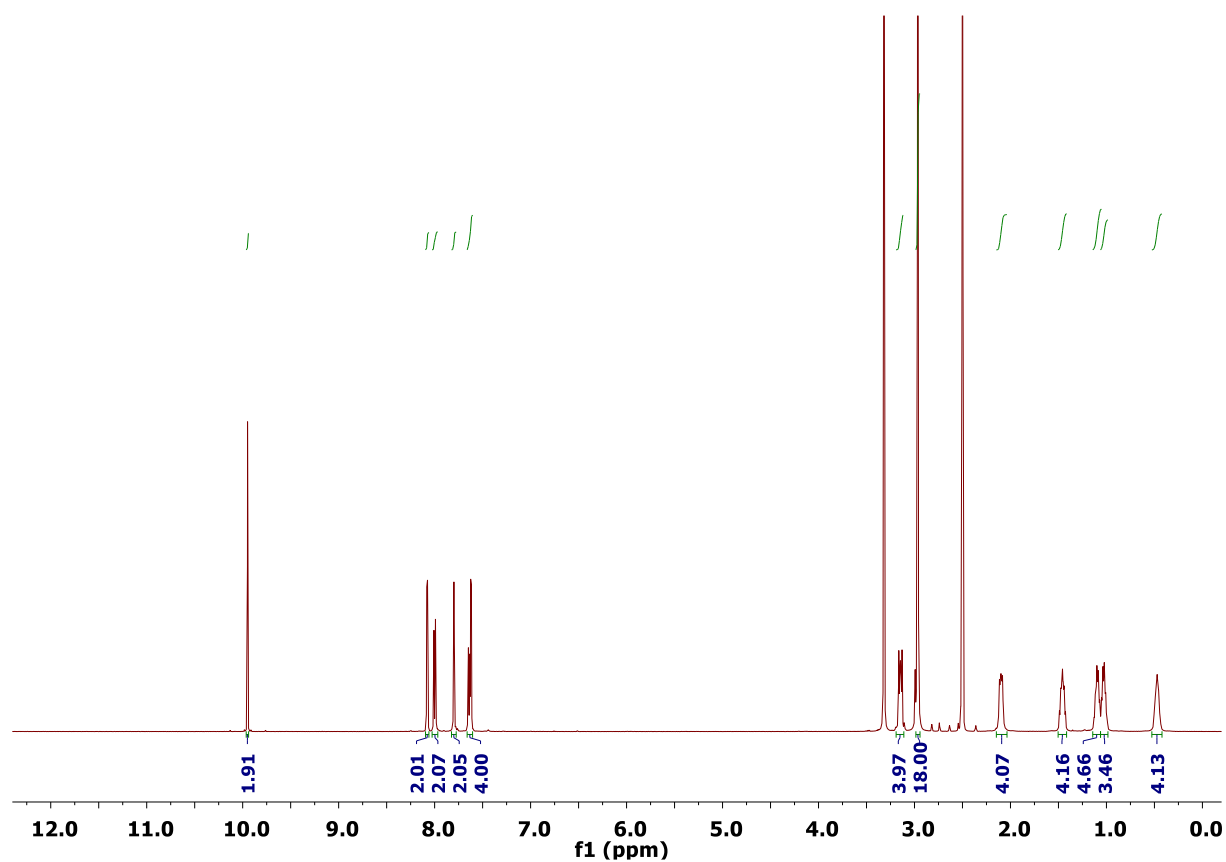

Figure S6: <sup>1</sup>H NMR spectrum (500 MHz) of **FT<sup>c</sup>** in DMSO-*d*<sub>6</sub> at 298K.

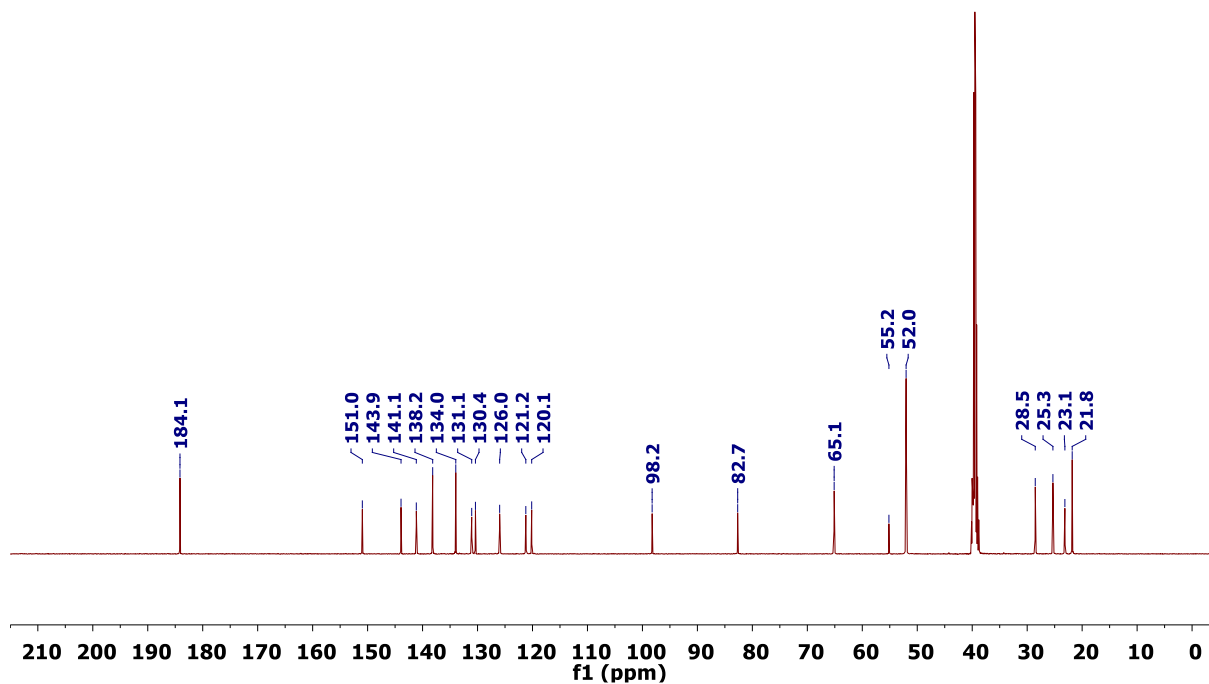

Figure S7:  $^{13}\text{C}\{^1\text{H}\}$  NMR spectrum (126 MHz) of **FT<sup>c</sup>** in  $\text{DMSO-}d_6$  at 298K.

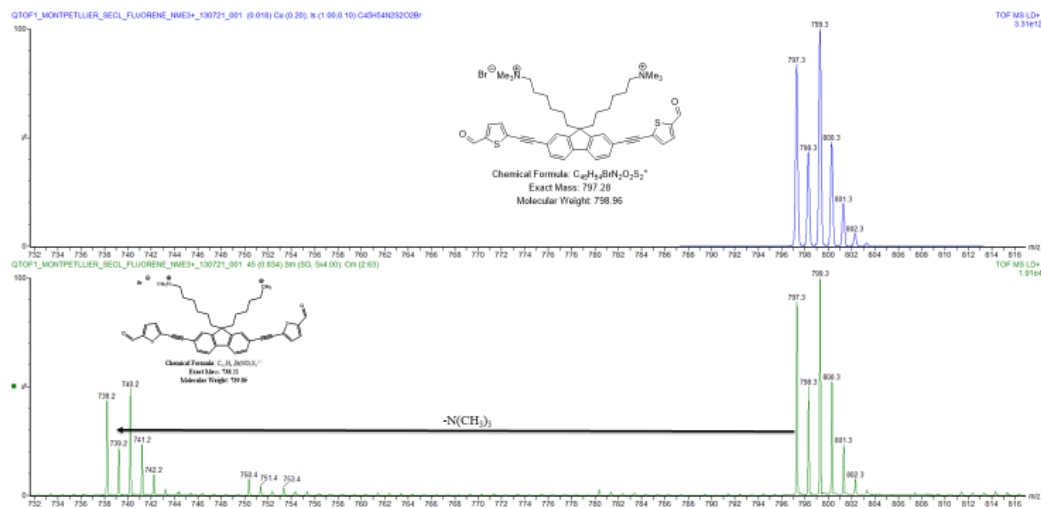

#### Elemental Composition Report

##### Single Mass Analysis

Tolerance = 25.0 PPM / DBE: min = -1.5, max = 150.0

Element prediction: Off

Number of isotope peaks used for i-FIT = 3

##### Monoisotopic Mass, Odd and Even Electron Ions

111 formula(e) evaluated with 4 results within limits (up to 50 closest results for each mass)

Elements Used:

C: 20-50 H: 0-60 N: 2-2 O: 0-10 S: 2-2 <sup>79</sup>Br: 1-2

|          |            |      |      |      |       |       |         |                                    |  |
|----------|------------|------|------|------|-------|-------|---------|------------------------------------|--|
| Minimum: |            |      |      | -1.5 |       |       |         |                                    |  |
| Maximum: |            |      | 5.0  | 25.0 | 150.0 |       |         |                                    |  |
| Mass     | Calc. Mass | mDa  | PPM  | DBE  | i-FIT | Norm  | Conf(%) | Formula                            |  |
| 797.2805 | 797.2810   | -0.5 | -0.6 | 19.5 | 107.1 | 1.553 | 21.15   | C45 H54 N2 O2 S2 <sup>79</sup> Br  |  |
|          | 797.2869   | -6.4 | -8.0 | 10.5 | 106.7 | 1.214 | 29.71   | C38 H58 N2 O7 S2 <sup>79</sup> Br  |  |
|          | 797.2716   | 8.9  | 11.2 | 6.5  | 106.6 | 1.095 | 33.46   | C34 H58 N2 O10 S2 <sup>79</sup> Br |  |
|          | 797.2658   | 14.7 | 18.4 | 15.5 | 107.4 | 1.852 | 15.68   | C41 H54 N2 O5 S2 <sup>79</sup> Br  |  |

Figure S8: High resolution MALDI-TOF mass spectrum of **FT<sup>c</sup>** in the positive mode.

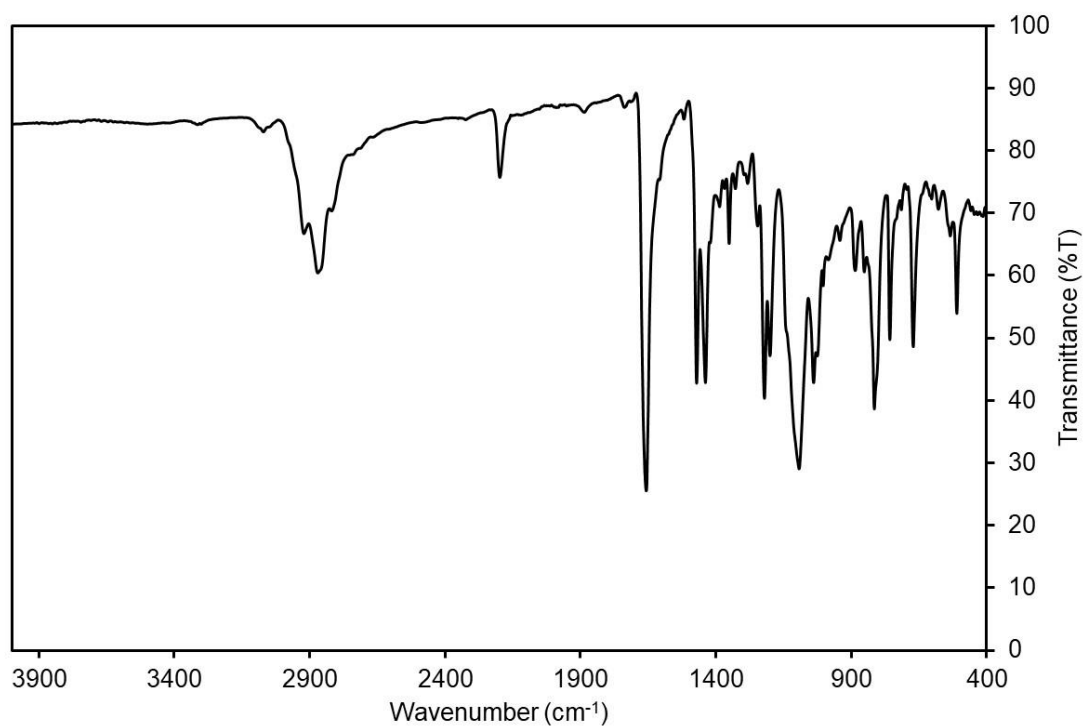

Figure S9: FTIR-ATR spectrum of **FT<sup>n</sup>**.

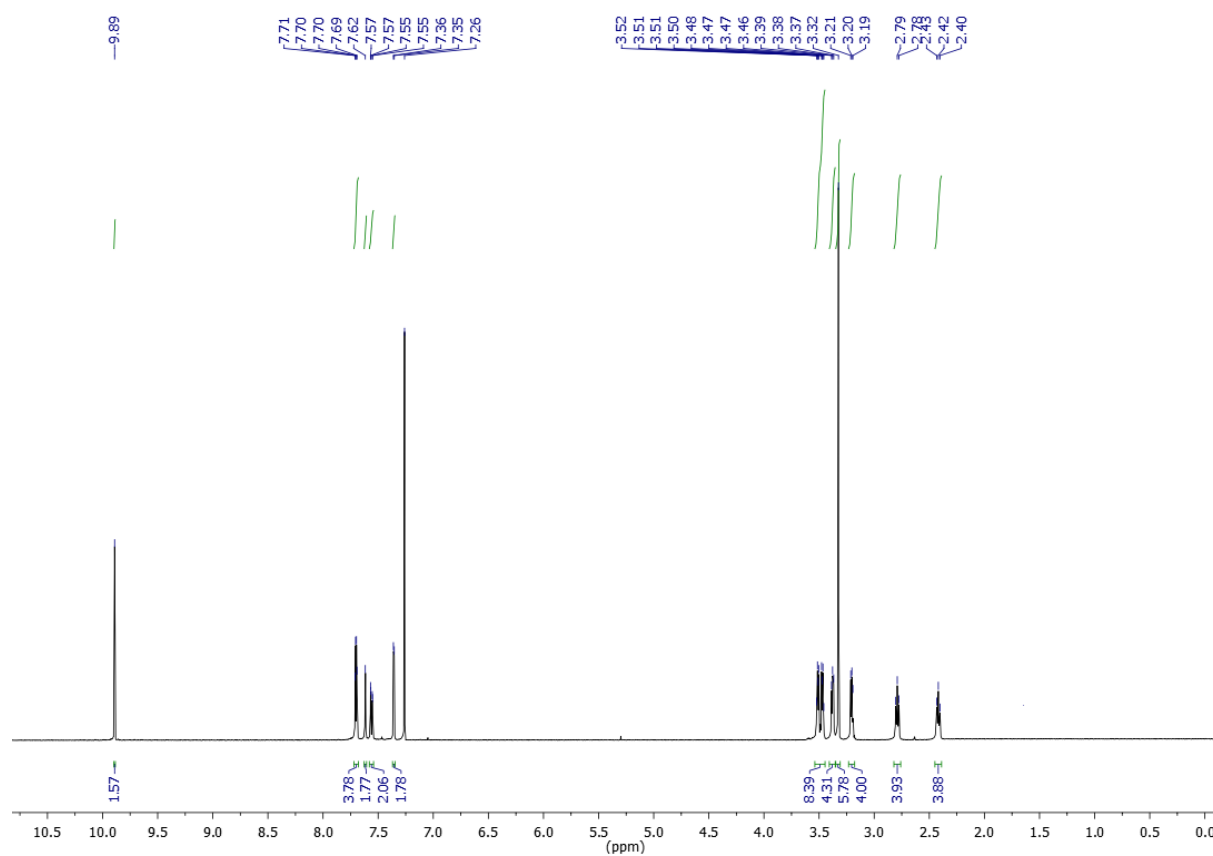

Figure S10:  $^1\text{H}$  NMR spectrum (500 MHz) of **FT<sup>n</sup>** in  $\text{CDCl}_3$  at 298K.

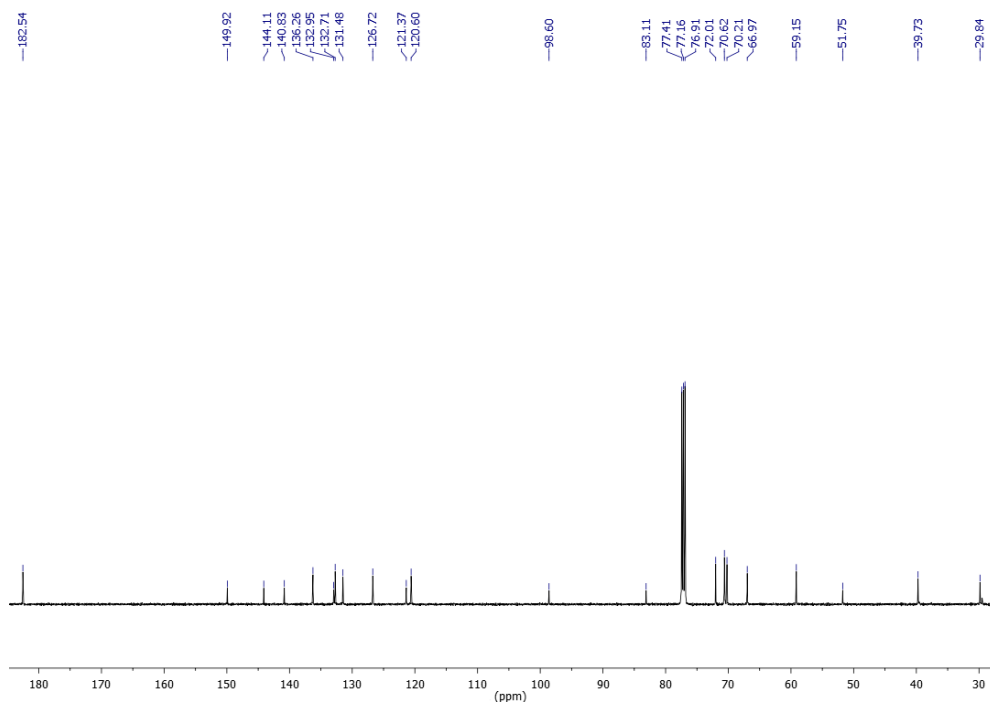

Figure S11:  $^{13}\text{C}\{^1\text{H}\}$  NMR spectrum (126 MHz) of  $\text{FT}^n$  in  $\text{CDCl}_3$  at 298K.

#### Single Mass Analysis

Tolerance = 3.0 PPM / DBE: min = -1.5, max = 100.0

Element prediction: Off

Number of isotope peaks used for i-FIT = 3

Monoisotopic Mass, Odd and Even Electron Ions

452 formula(e) evaluated with 2 results within limits (up to 50 best isotopic matches for each mass)

Elements Used:

C: 0-100 H: 0-100 O: 0-20 S: 0-2

SYNAPT G2-S#UEB205

Y-CMOS18010903 748 (2.957) Cm (696.759)

CLKO A 99

09-Jan-2018

1: TOF MS ASAP+

8.46e+003

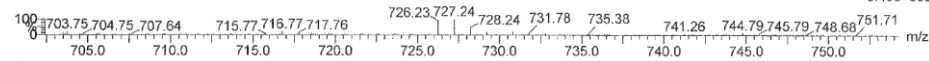

Minimum:

Maximum:

10.0 3.0 -1.5

Mass Calc. Mass mDa PPM DBE i-FIT Norm Conf(%) Formula

| Mass     | Calc. Mass | mDa  | PPM  | DBE  | i-FIT | Norm  | Conf(%) | Formula       |
|----------|------------|------|------|------|-------|-------|---------|---------------|
| 726.2314 | 726.2312   | 0.2  | 0.3  | 22.0 | 263.6 | 0.094 | 91.03   | C40 H38 O13   |
|          | 726.2321   | -0.7 | -1.0 | 21.0 | 265.9 | 2.411 | 8.97    | C41 H42 O8 S2 |

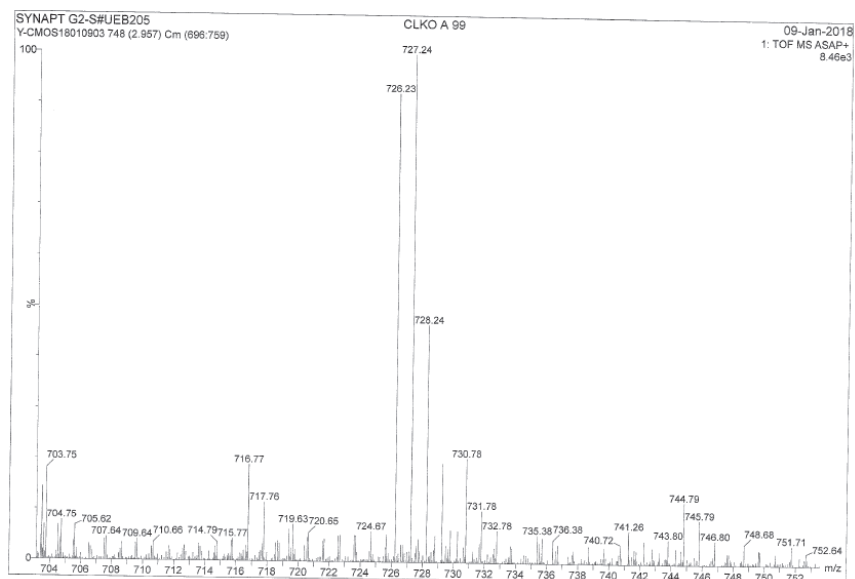

Figure S12: High resolution ASAP<sup>+</sup> mass spectrum of  $\text{FT}^n$  in the positive mode.



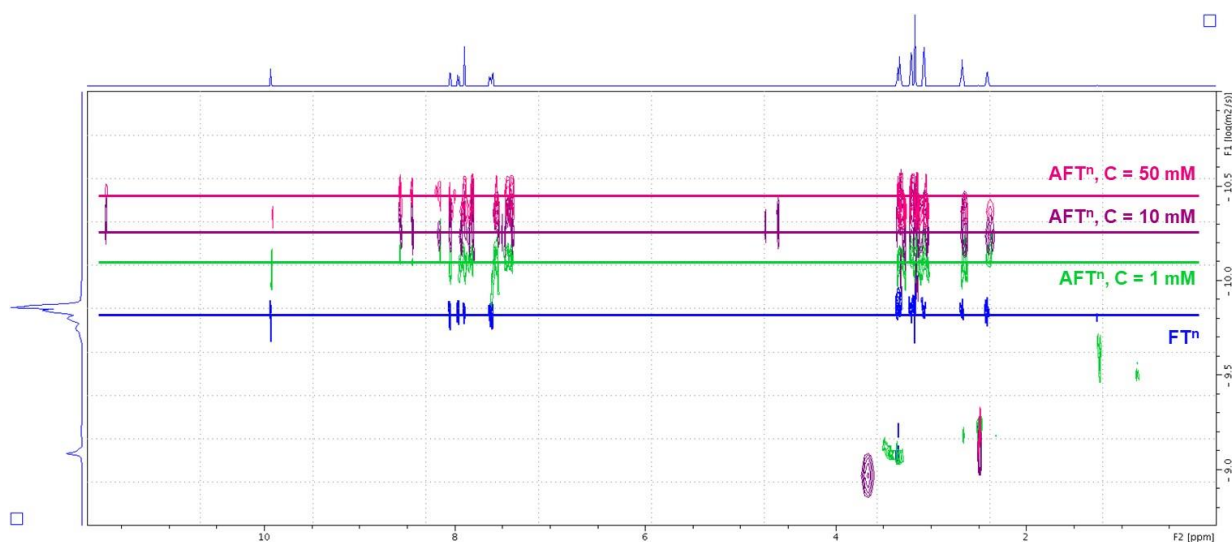

Figure S13: Superimposition of DOSY-NMR spectra (600 MHz) of **AFT<sup>n</sup>** at 1 mM (green), 10 mM (purple) and 50 mM (pink) compared to **AFT<sup>n</sup>** (blue) in DMSO-*d*<sub>6</sub> at 298K.

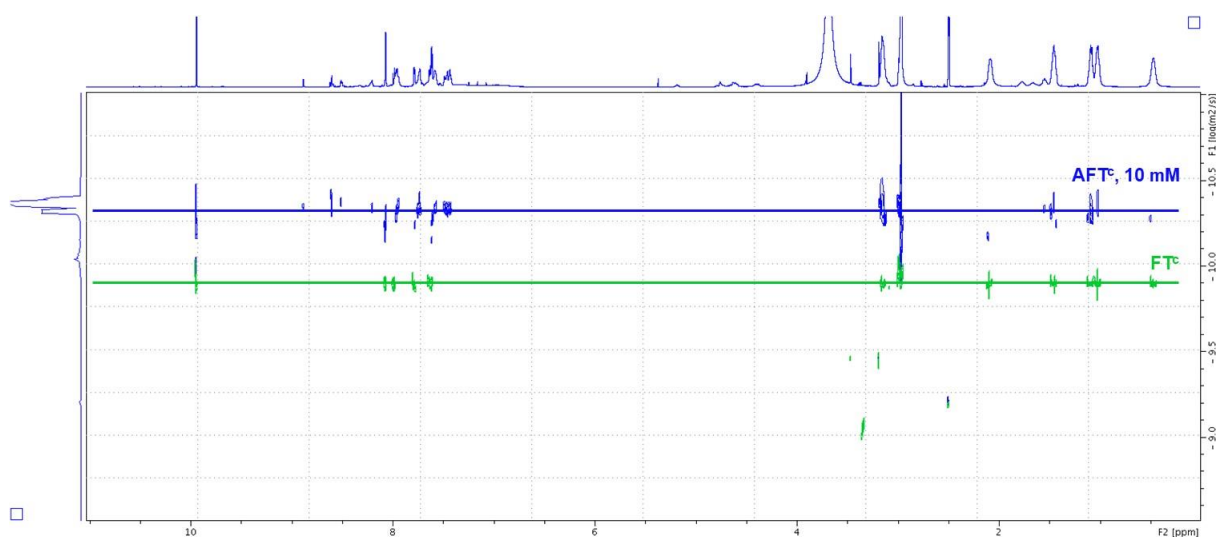

Figure S14: Superimposition of DOSY-NMR spectra (600 MHz) of **AFT<sup>c</sup>** at 10 mM (blue) compared to **FT<sup>c</sup>** (green) in DMSO-*d*<sub>6</sub> at 298K.

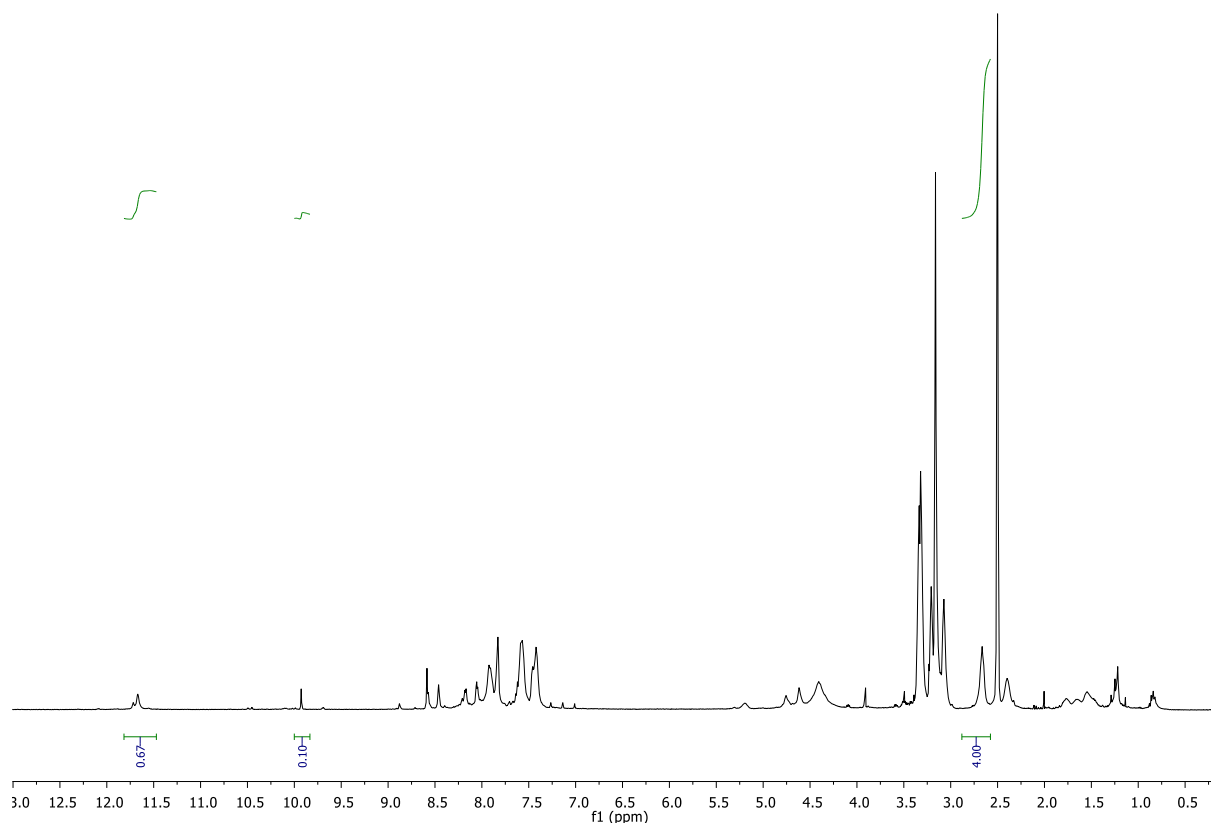

Figure S15:  $^1\text{H}$  NMR spectrum (600 MHz) of **AFT<sup>n</sup>** at 100 mM in  $\text{DMSO-}d_6$  at 298K.

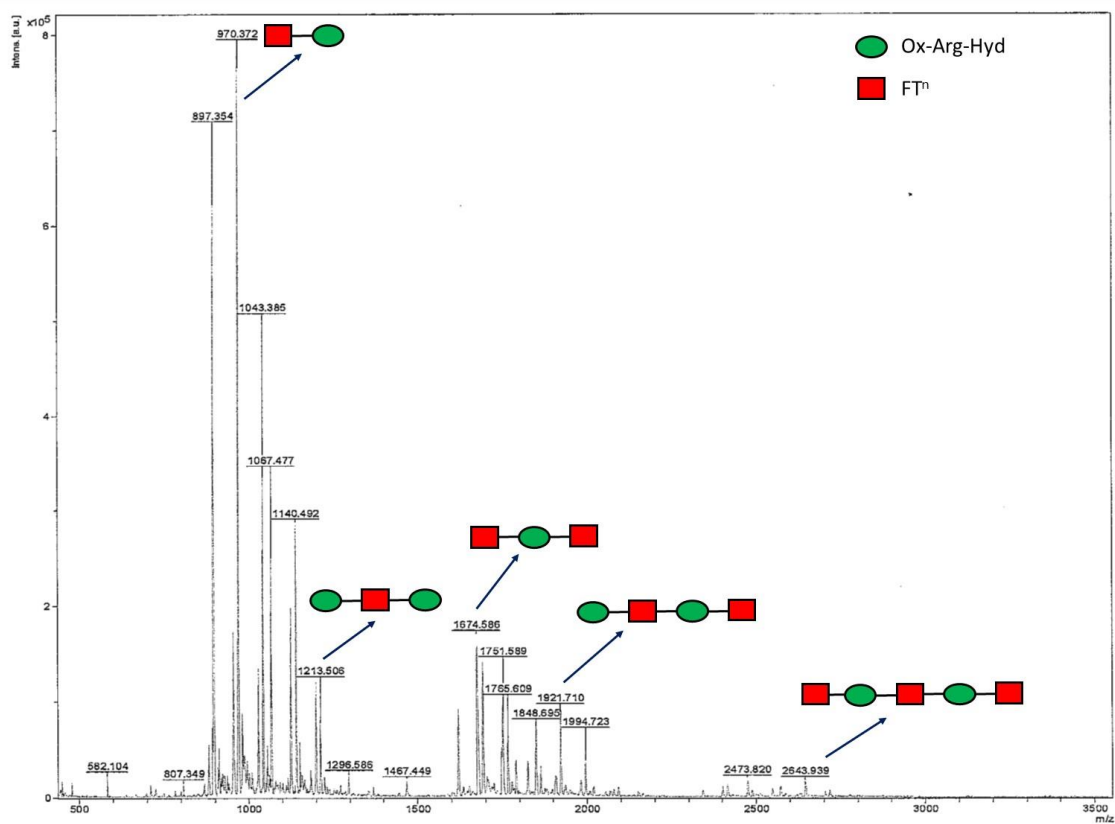

Figure S16: MALDI-TOF (HCCA matrix) mass spectrometry analysis of **AFT<sup>n</sup>**, prepared by the self-assembly of **FT<sup>n</sup>** and **Ox-Arg-Hyd** carried out at 100 mM in DMSO.

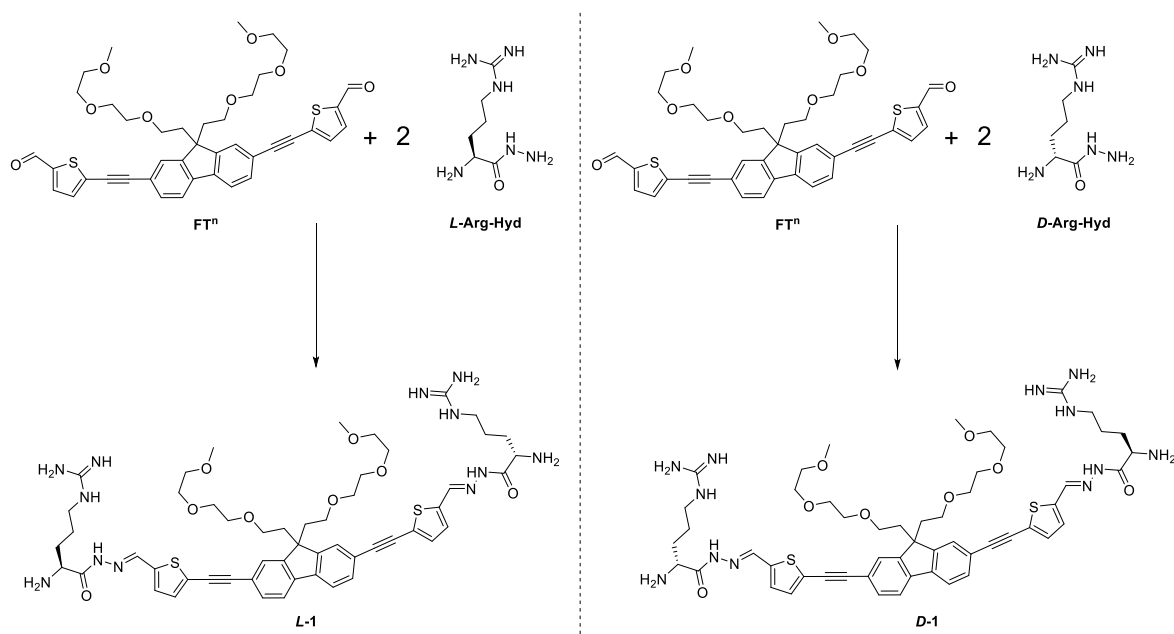

Figure S17: Synthesis of **FT<sup>n</sup>**-based model compounds from **L-Arg-Hyd** and **D-Arg-Hyd**.

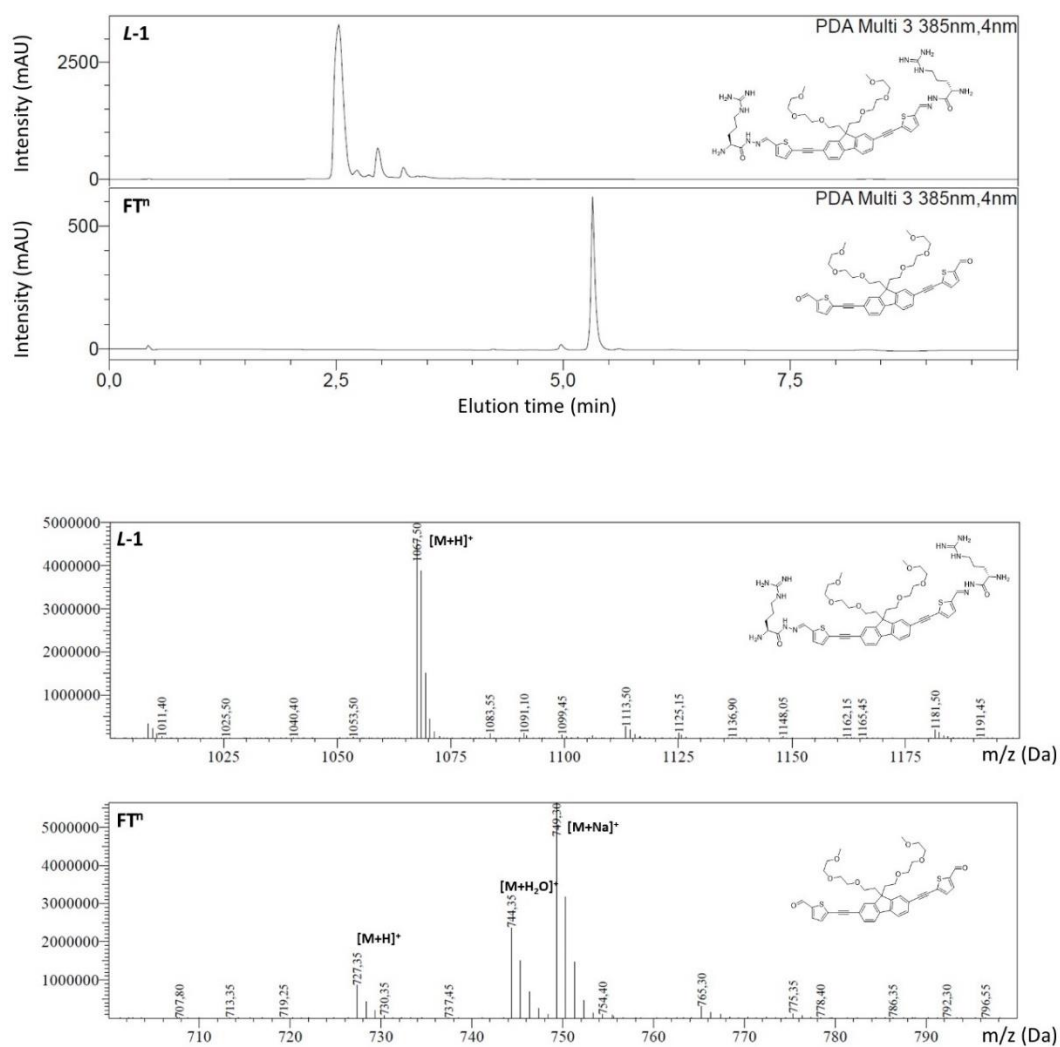

Figure S18: LCMS chromatogram of **L-1**.

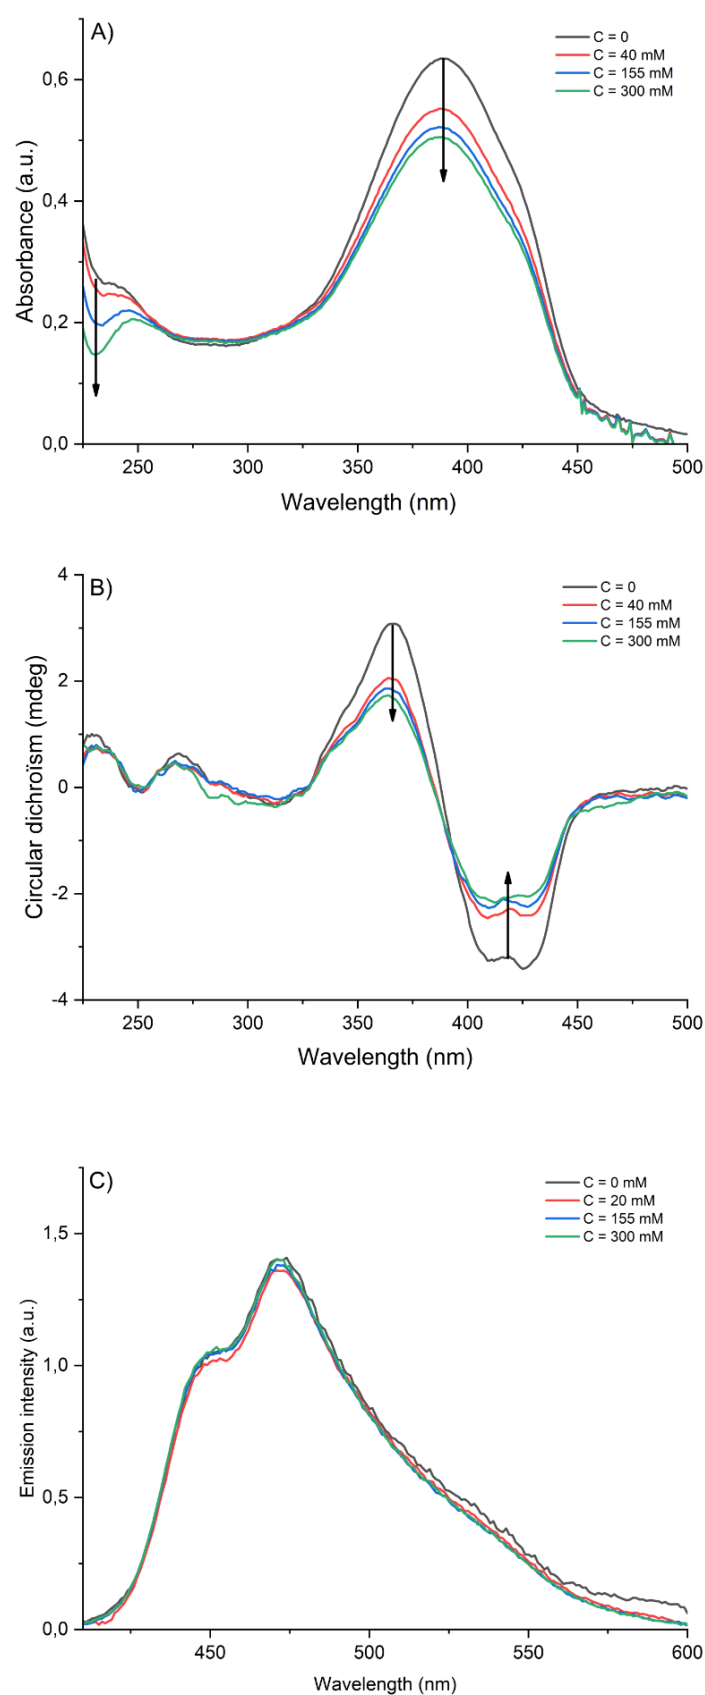

Figure S19: A) UV-Visible absorption, B) CD and C) emission spectra ( $\lambda_{\text{exc}} = 385 \text{ nm}$ ) of **AFT<sup>c</sup>** at 10  $\mu\text{M}$  in TE buffer after successive additions of guanidinium chloride.

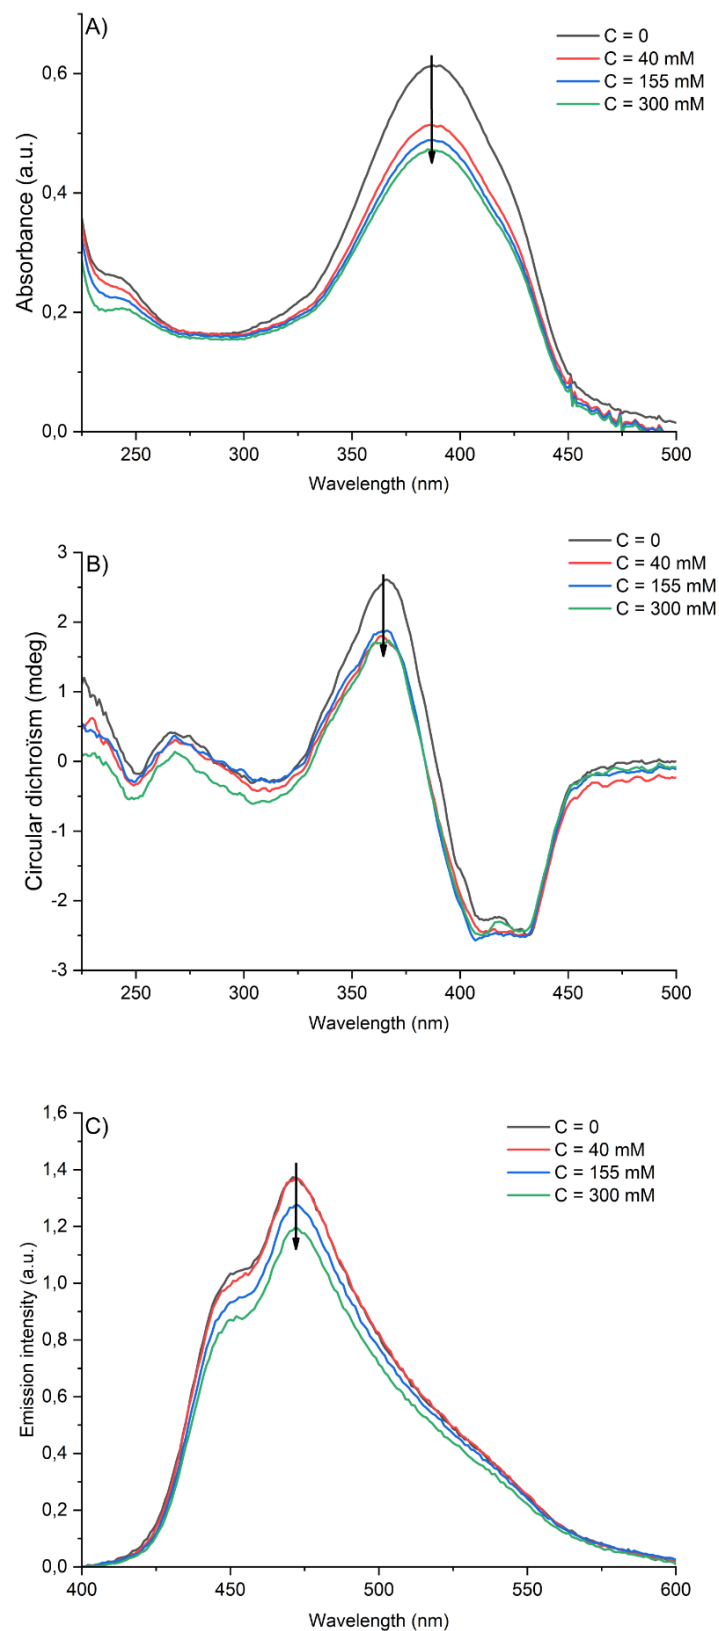

Figure S20: A) UV-Visible absorption, B) CD and C) emission spectra ( $\lambda_{\text{exc}} = 385 \text{ nm}$ ) of **AFT<sup>c</sup>** at 10  $\mu\text{M}$  in TE buffer after successive additions of ammonium sulfate.

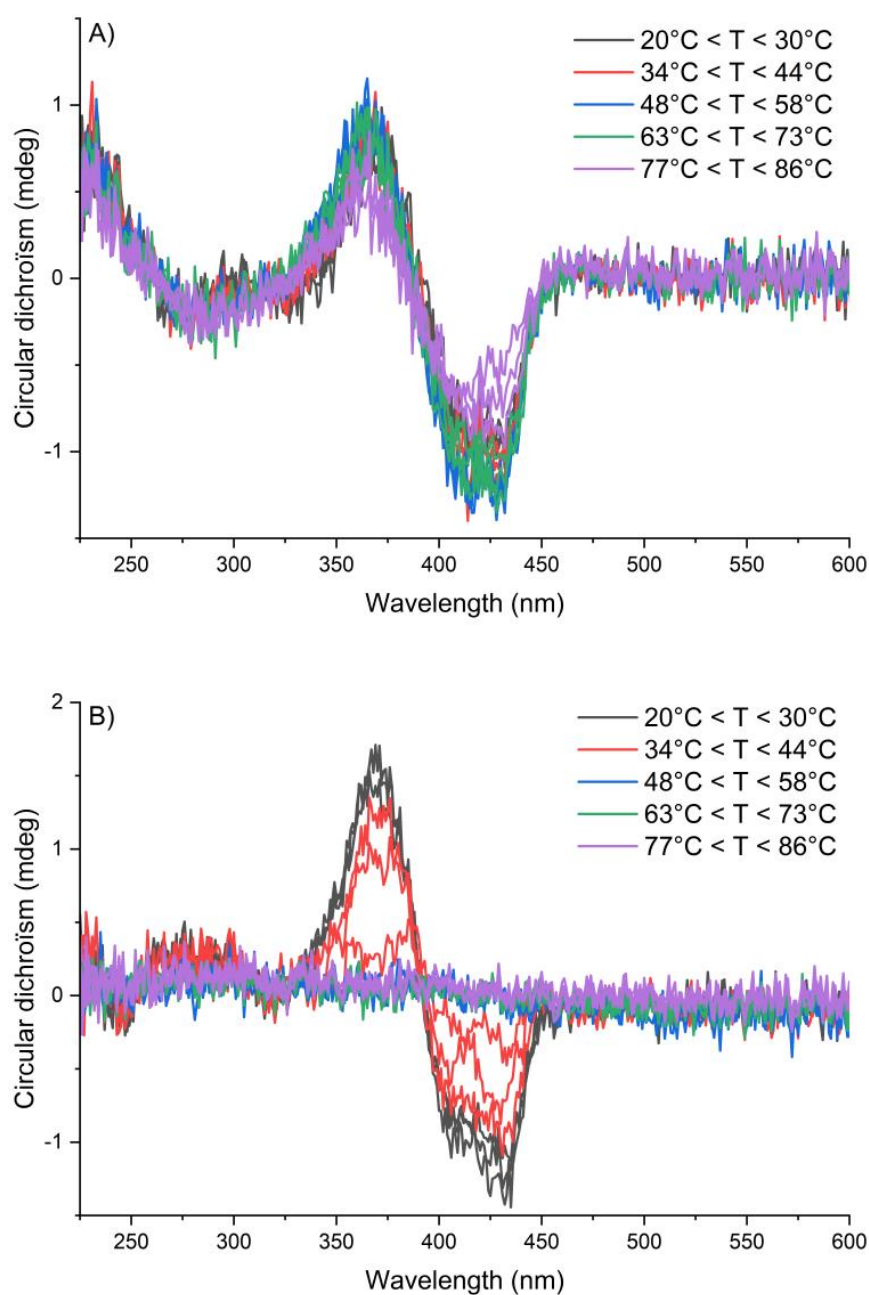

Figure S21: CD spectra of A) **AFT<sup>c</sup>** and B) **AFT<sup>n</sup>** solutions at 10  $\mu$ M in TE buffer recorded from 20°C to 86°C.

| Name         | Length | Sequence (5'-3')                                                   |
|--------------|--------|--------------------------------------------------------------------|
| <b>dsR20</b> | 20     | 5'-CGT CAC GTA AAT CGG TTA AC-3'                                   |
| <b>dsR43</b> | 43     | 5'-CGT CAC GTA AAT CGG TTA ACA AAT GGC TTT CGA<br>AGC TAG CTT C-3' |

Table S1: Name, length and sequence of the dsDNAs employed in this study.

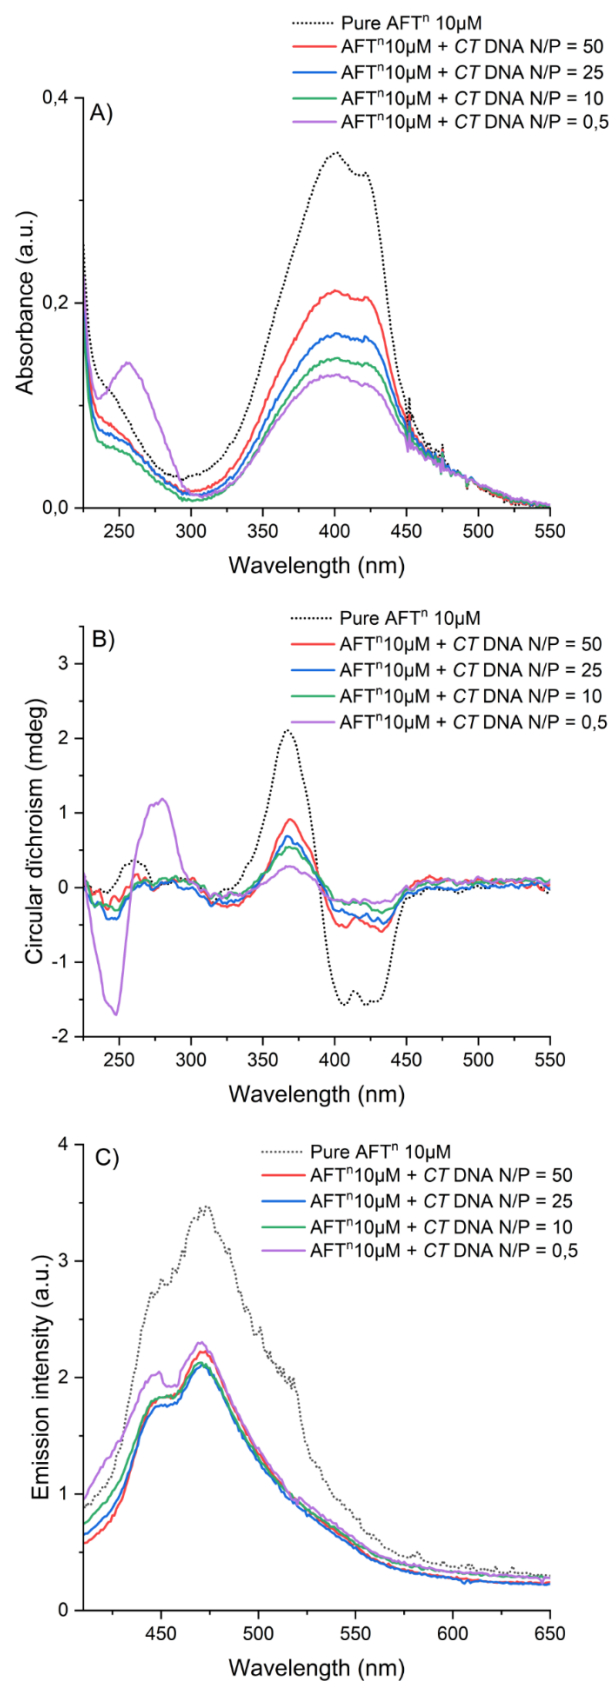

Figure S22: UV-Vis absorption (A), CD (B) and emission (C) spectra of 10  $\mu\text{M}$  AFT<sup>n</sup> solutions in TE buffer (pH 7.4) upon addition of calf thymus (CT) DNA.

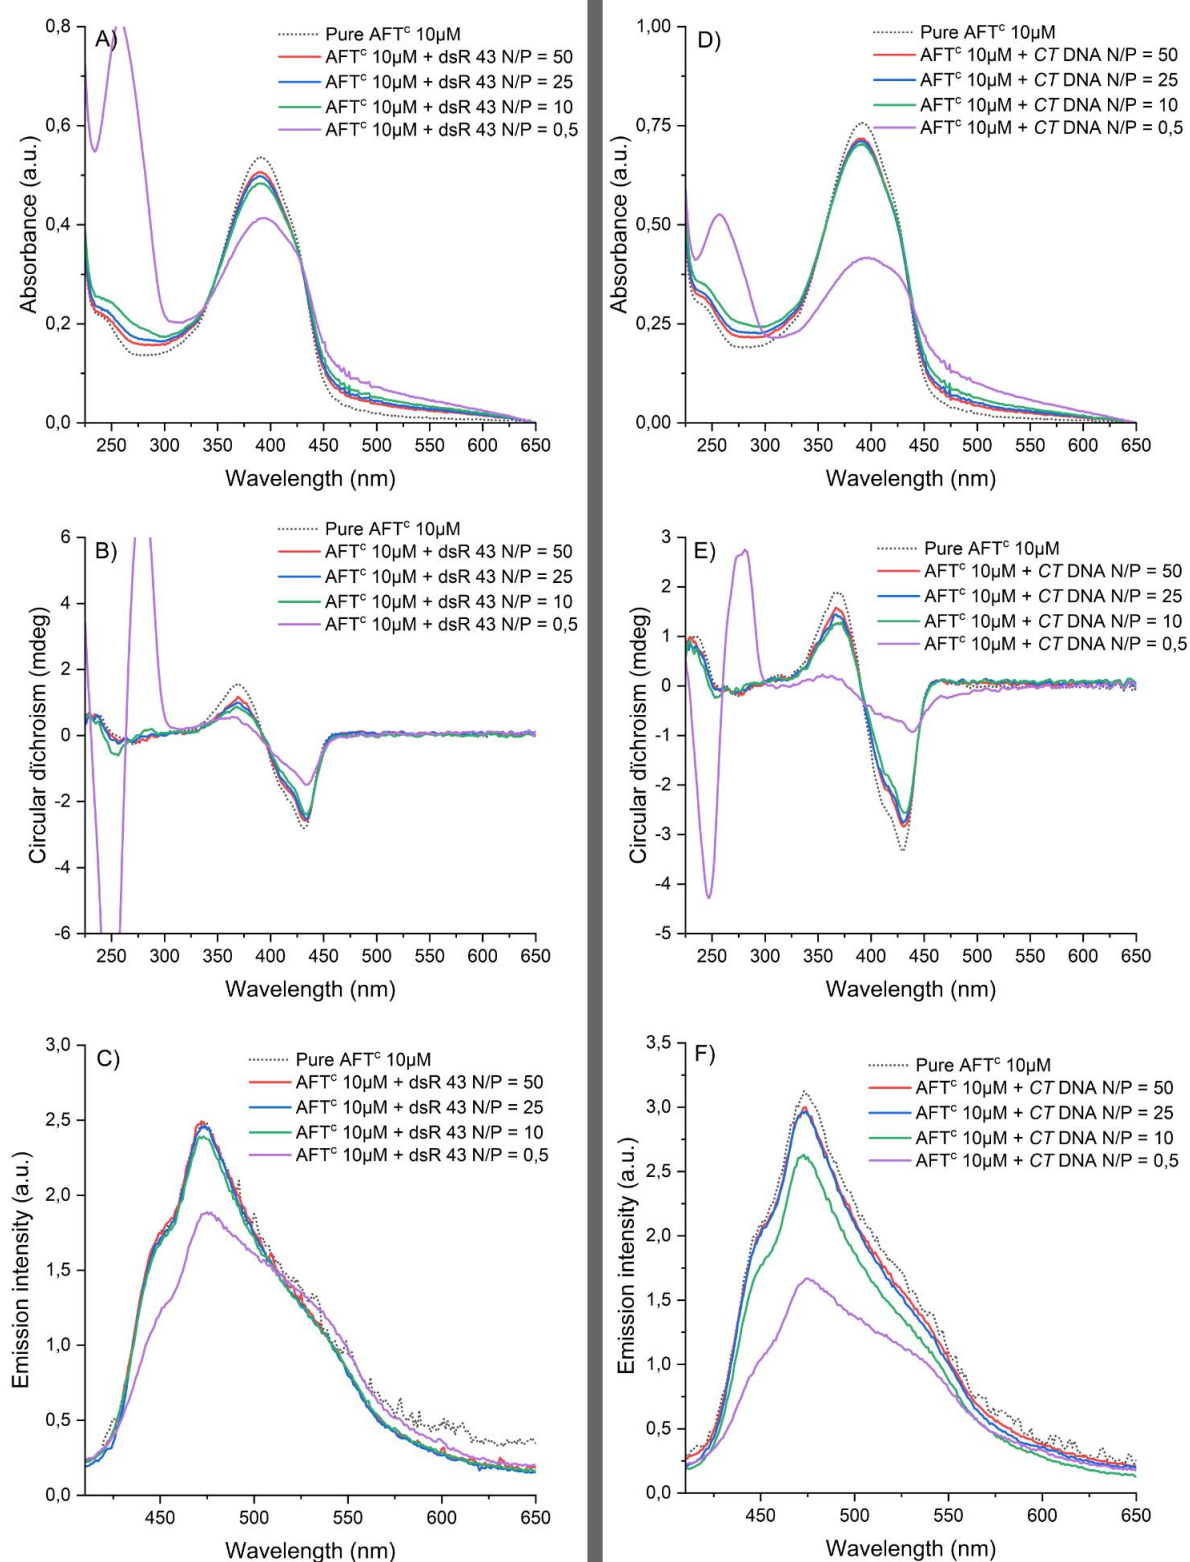

Figure S23: UV-Vis absorption (A), CD (B) and emission (C) spectra of 10  $\mu\text{M}$  **AFT<sup>c</sup>** solutions in TE buffer (pH 7.4) upon addition of dsR43 DNA ; UV-Vis absorption (D). CD (E) and emission (F) spectra of 10  $\mu\text{M}$  **AFT<sup>c</sup>** solutions in TE buffer (pH 7.4) upon addition of calf thymus (CT) DNA.



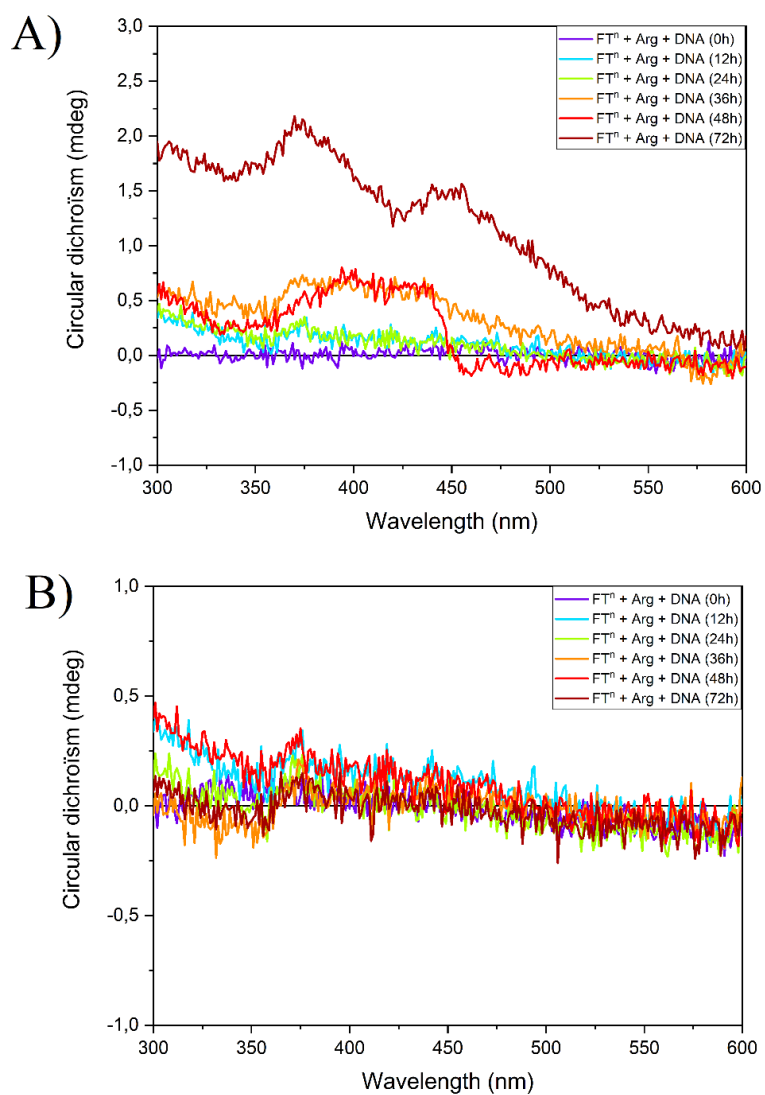

Figure S24: CD spectra of a mixture of **FT<sup>n</sup>** and **OxArgHyd** in TE buffer at 10  $\mu$ M associated with calf thymus DNA at N/P = 5 recorded between 0 and 72h A/ in absence and B/ presence of 100 equivalents of methoxyamine.

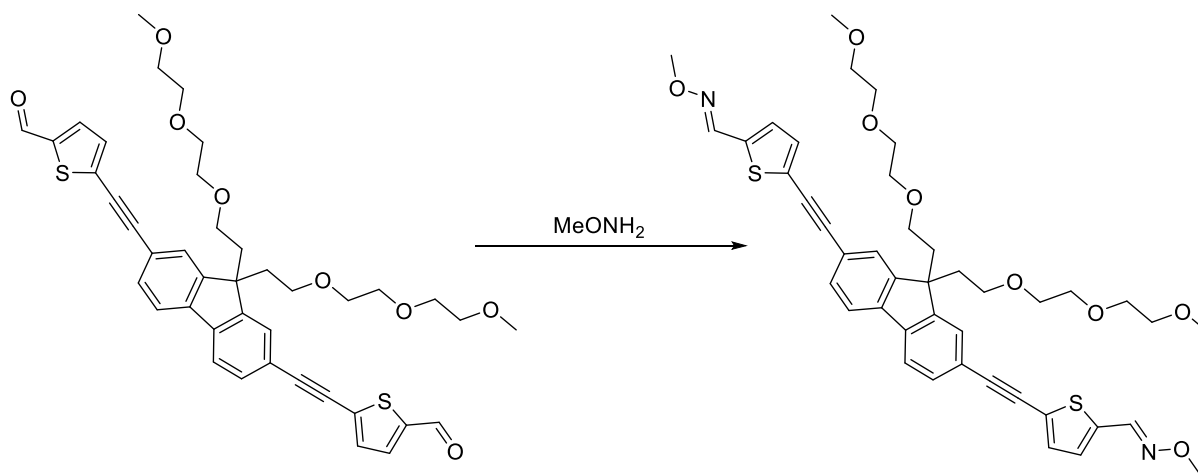

Scheme S1: Formation of the oxime **Ox-FT<sup>n</sup>-Ox**.
